# Supplementary material for: A Novel Single Cell RNA-seq Analysis of Non-Myeloid Circulating Cells in Late Sepsis
Source: PubMed Central journal article supplement (PMC8415415; doi:10.3389/fimmu.2021.696536), 2021-08-16

**Supplementary Data Sheet 3. Volcano plots for each cell cluster of the top up and down regulated genes between healthy versus chronic critical illness late sepsis non-myeloid cells.**

● Adjusted P-value < .01 ● NS

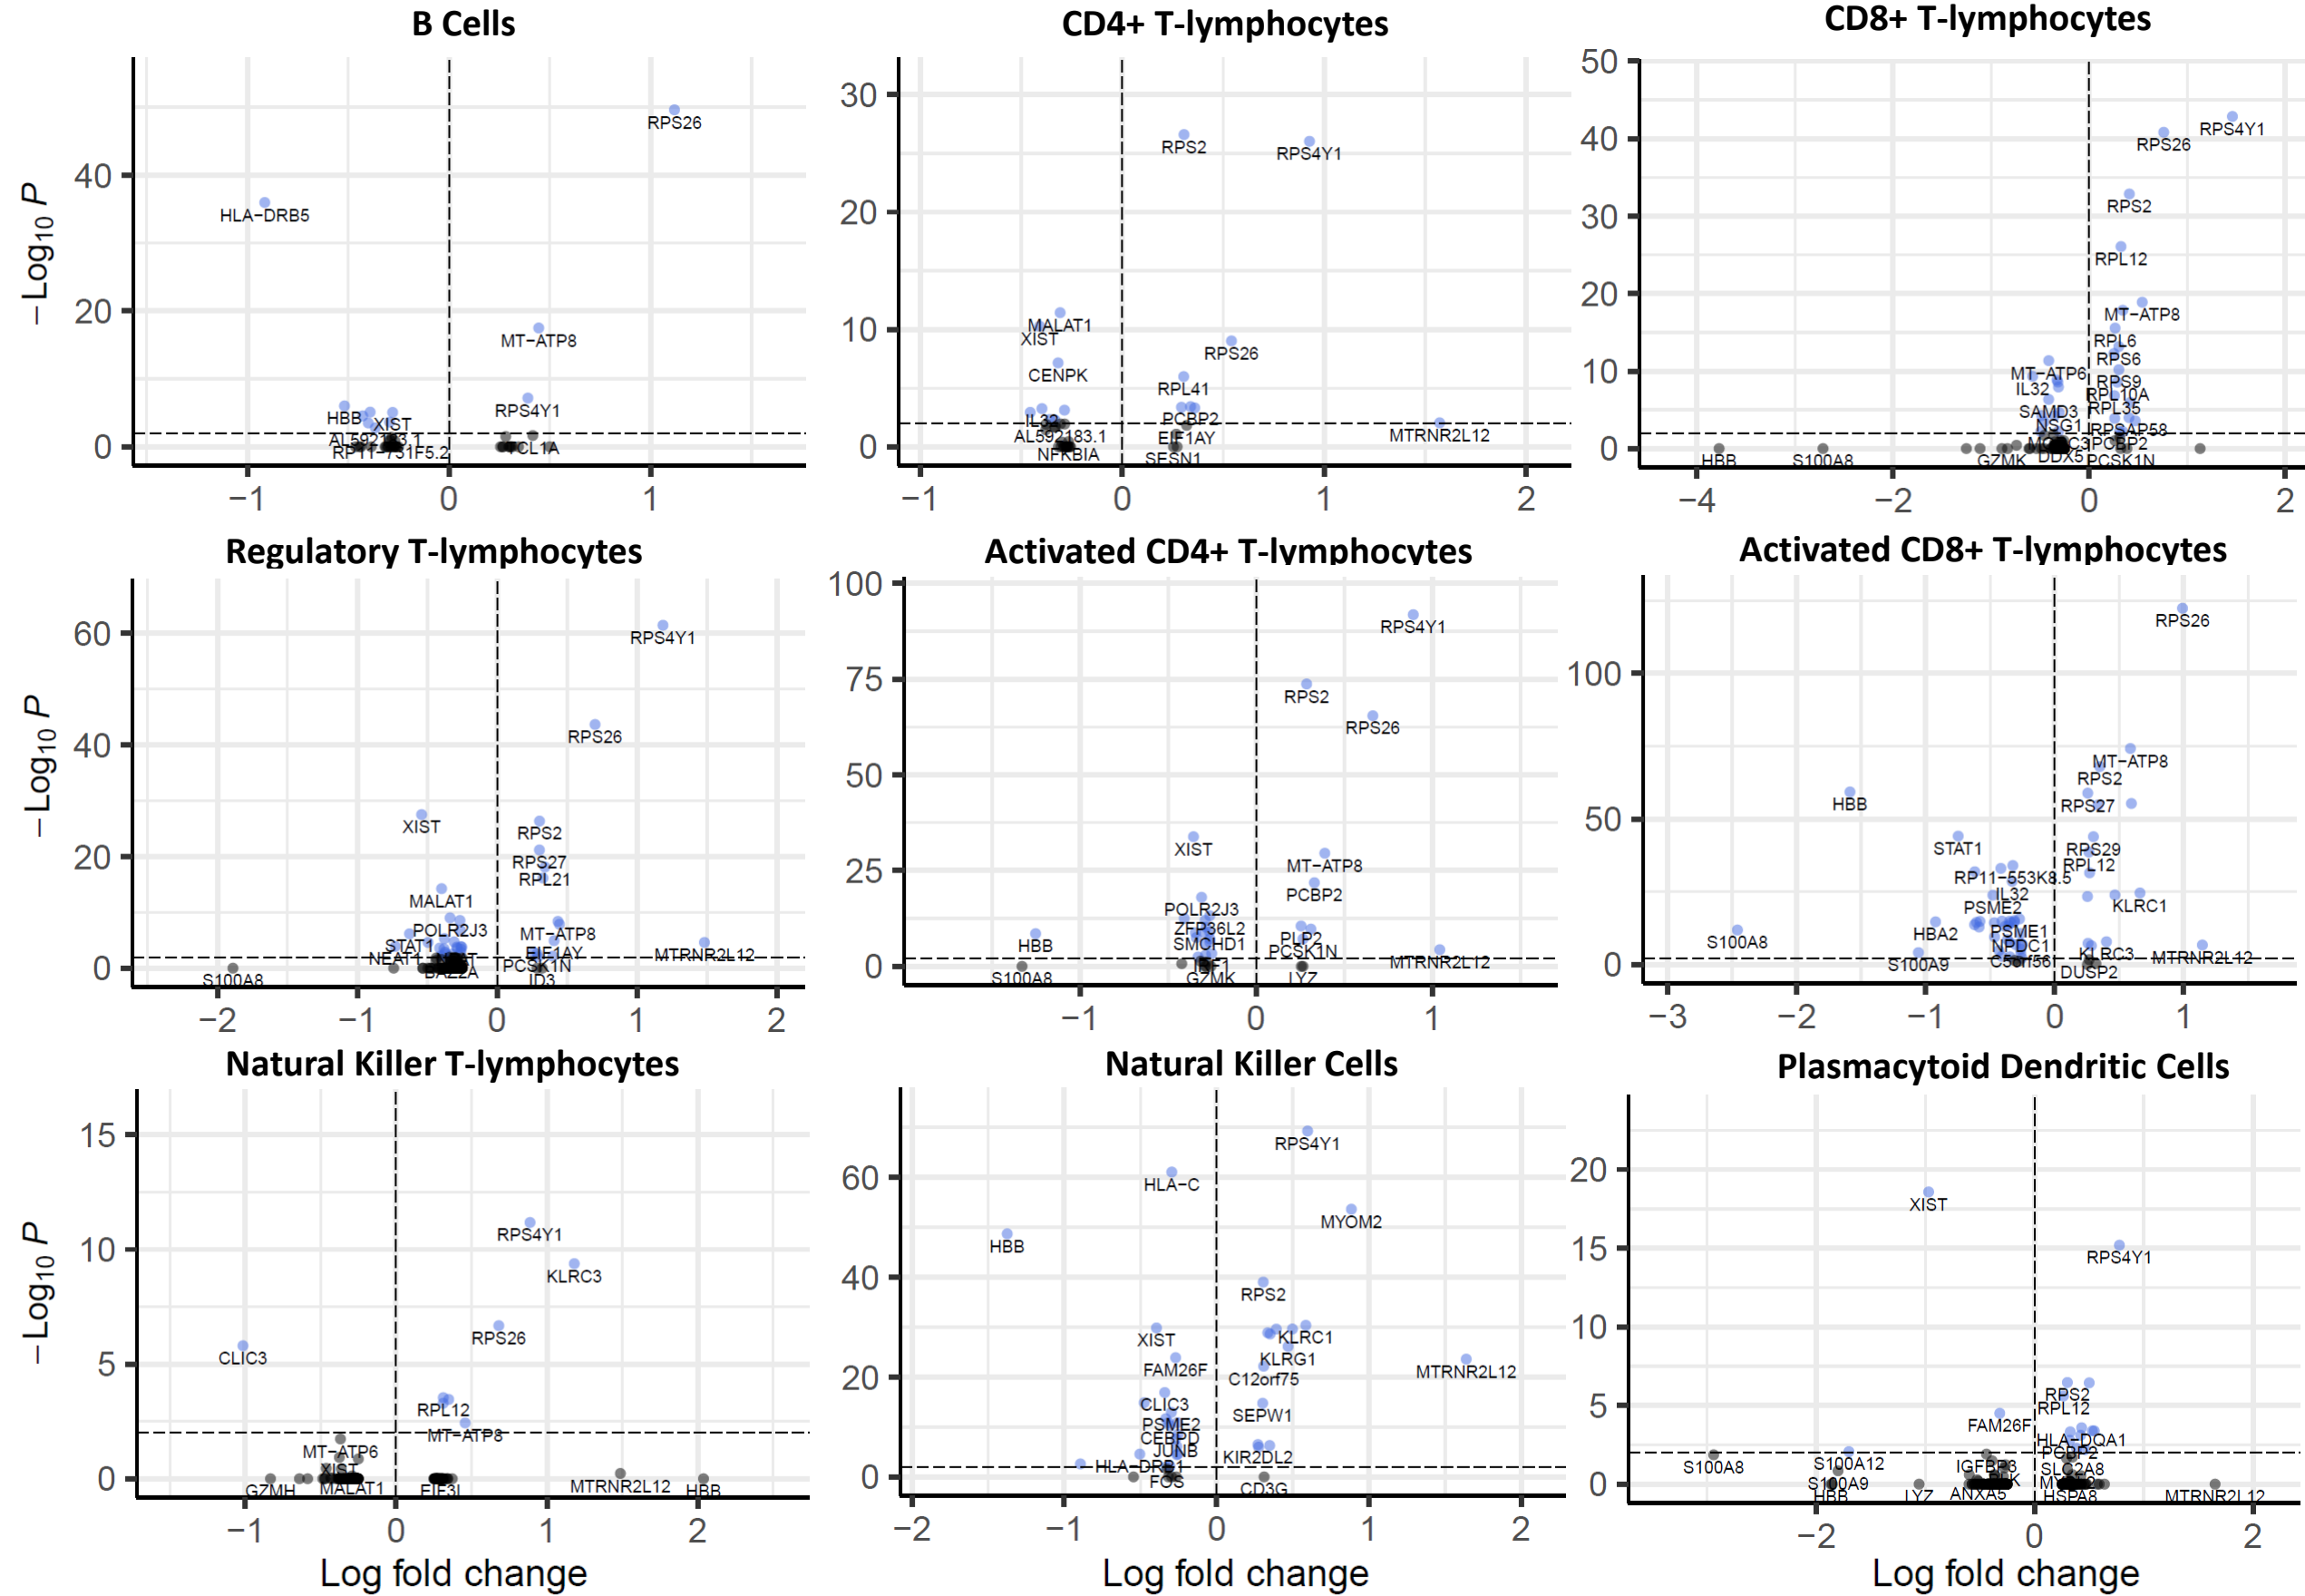

Supplement: DataSheet_3.pdf [file DataSheet_3.pdf]
